# Supplementary material for: Improvement of stability of ZnO/CH3NH3PbI3 bilayer by aging step for preparing high-performance perovskite solar cells under ambient conditions
Source: Royal Society of Chemistry journal article supplement (doi:10.1039/c6ra10072d), 2016-01-01
Supplement: c6ra10072d1.pdf [file c6ra10072d1.pdf]

Electronic Supplementary Information

**Improvement of stability of ZnO/CH<sub>3</sub>NH<sub>3</sub>PbI<sub>3</sub> bilayer by aging step  
for preparing high-performance perovskite solar cells under ambient  
conditions**

Y. Guo,<sup>a</sup> X. Li,<sup>\*b, a</sup> L. L. Kang,<sup>a</sup> X. He,<sup>a</sup> Z. Q. Ren,<sup>a</sup> J. D. Wu<sup>a</sup> and J. Y. Qi<sup>\*c</sup>

<sup>a</sup> School of Chemistry and Chemical Engineering, Harbin Institute of Technology, Harbin 150090, China.

<sup>b</sup> State Key Lab of Urban Water Resource and Environment, Harbin Institute of Technology, Harbin 150090, China.

<sup>c</sup> School of Municipal and Environmental Engineering, Harbin Institute of Technology, Harbin 150090, China.

\*Corresponding author

*E-mail Address:* lixin@hit.edu.cn (X. Li); jyq@hit.edu.cn (J.Y. Qi)

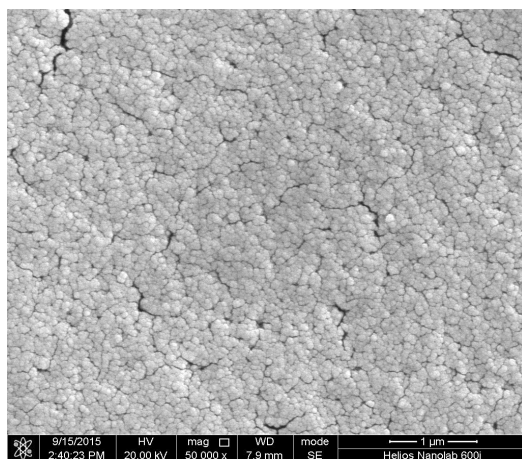

Fig. S1. SEM image of ZnO film annealed at 70 °C for 30 min.

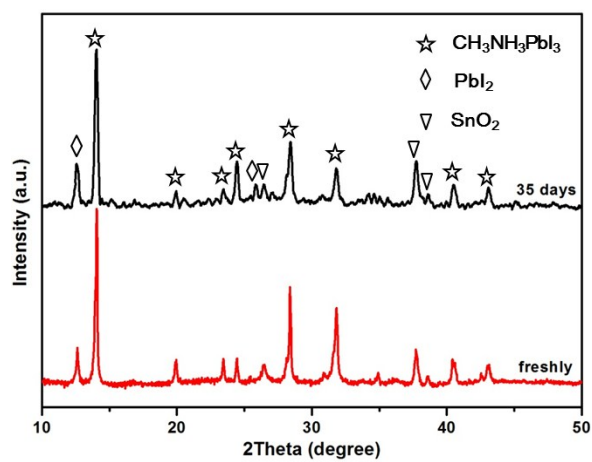

Fig. S2. XRD patterns of aged ZnO/CH<sub>3</sub>NH<sub>3</sub>PbI<sub>3</sub> bilayer. The red line is collected from fresh sample and the black line refers to the one stored for 35 days under ambient conditions (25 °C and 30% humidity).
